# Supplementary material for: A highly conserved cryptic epitope in the receptor-binding domains of SARS-CoV-2 and SARS-CoV
Source: bioRxiv or medRxiv preprint supplement (doi:10.1101/2020.03.13.991570), 2020-03-14
Supplement: Supplementary file [file media-1.pdf]

1 **Supplementary Materials for**

2

3 **A highly conserved cryptic epitope in the receptor-binding**  
4 **domains of SARS-CoV-2 and SARS-CoV**

5

6

7

8 Meng Yuan<sup>1,\*</sup>, Nicholas C. Wu<sup>1,\*</sup>, Xueyong Zhu<sup>1</sup>, Chang-Chun D. Lee<sup>1</sup>, Ray T. Y. So<sup>2</sup>,

9 Huibin Lv<sup>2</sup>, Chris K. P. Mok<sup>2</sup>, Ian A. Wilson<sup>1,3,§</sup>

10

11

12

13

14 <sup>1</sup> Department of Integrative Structural and Computational Biology, The Scripps Research  
15 Institute, La Jolla, CA 92037, USA

16 <sup>2</sup> HKU-Pasteur Research Pole, School of Public Health, Li Ka Shing Faculty of Medicine,  
17 The University of Hong Kong, Hong Kong SAR, China

18 <sup>3</sup> The Skaggs Institute for Chemical Biology, The Scripps Research Institute, La Jolla,  
19 CA, 92037, USA

20 \* These authors contributed equally to this work

21 <sup>§</sup> Correspondence: [wilson@scripps.edu](mailto:wilson@scripps.edu) (I.A.W.)

22 **This PDF file includes:**

23 Materials and Methods

24 Figs. S1 to S6

25 Tables S1 to S3

26 References 38-47

27

## 28 **MATERIALS AND METHODS**

### 29 **Expression and purification of RBD**

30 The receptor-binding domain (RBD) (residues 319-541) of the SARS-CoV-2 spike (S)  
31 protein (GenBank: QHD43416.1), as well as the RBD (residues 306-527) of the SARS-  
32 CoV S protein (GenBank: ABF65836.1), were cloned into a customized pFastBac vector  
33 (38). The RBD constructs were fused with an N-terminal gp67 signal peptide and a C-  
34 terminal His<sub>6</sub> tag. Recombinant bacmid DNA was generated using the Bac-to-Bac  
35 system (Life Technologies). Baculovirus was generated by transfecting purified bacmid  
36 DNA into Sf9 cells using FuGENE HD (Promega), and subsequently used to infect  
37 suspension cultures of High Five cells (Life Technologies) at an MOI of 5 to 10. Infected  
38 High Five cells were incubated at 28 °C with shaking at 110 r.p.m. for 72 h for protein  
39 expression. The supernatant was then concentrated using a 10 kDa MW cutoff  
40 Centramate cassette (Pall Corporation). The S and RBD proteins were purified by Ni-  
41 NTA, followed by size exclusion chromatography, and buffer exchanged into 20 mM Tris-  
42 HCl pH 7.4 and 150 mM NaCl.

43

### 44 **Expression and purification of CR3022 Fab and IgG**

45 The CR3022 Fab heavy (GenBank: DQ168569.1) and light (GenBank: DQ168570.1)  
46 chains were cloned into pHCMV3. The plasmids were transiently co-transfected into  
47 Expi293F cells at a ratio of 2:1 (HC:LC) using ExpiFectamine™ 293 Reagent (Thermo

48 Fisher Scientific) according to the manufacturer's instructions. The supernatant was  
49 collected at 7 days post-transfection. The Fab was purified with a CaptureSelect™ CH1-  
50 XL Pre-packed Column (Thermo Fisher Scientific) followed by size exclusion  
51 chromatography.

52

53 For full-length IgGs of CR3022, m396 (sequences from PDB 2DD8 (16)), and S230.15  
54 (sequences from PDB 6NB6 (39)), the heavy-chain and light-chain plasmids were  
55 transiently co-transfected into ExpiCHO cells at a ratio of 2:1 using ExpiFectamine™  
56 CHO Reagent (Thermo Fisher Scientific) according to the manufacturer's instructions.  
57 The supernatant was collected at 14 days post-transfection. The IgGs were purified  
58 using a Protein G column (GE Healthcare), and further purified by size exclusion  
59 chromatography.

60

### 61 **Crystallization and structural determination**

62 Purified CR3022 Fab and SARS-CoV-2 RBD were mixed at a molar ratio of 1:1 and  
63 incubated overnight at 4 °C. The complex (15 mg/ml) was screened for crystallization  
64 using the 384 conditions of the JCSG Core Suite (Qiagen) at 293 K on our custom-  
65 designed robotic CrystalMation system (Rigaku) at Scripps Research by the vapor  
66 diffusion method in sitting drops containing 0.1 µl of protein and 0.1 µl of reservoir  
67 solution. Optimized crystals were then grown in 80 mM sodium acetate pH 4.6, 1.5 M  
68 ammonium sulfate, and 20% glycerol. Crystals were grown for 14 days and then flash  
69 cooled in liquid nitrogen. Diffraction data were collected at cryogenic temperature (100  
70 K) at beamline 23-ID-D of the Argonne Photon Source (APS) with a beam wavelength of  
71 1.033 Å, and processed with HKL2000 (40). Structures were solved by molecular  
72 replacement using PHASER with homology models for Fab CR3022 generated from  
73 PDB ID: 4KMT (41) and for SARS-CoV-2 RBD generated from a structure of SARS-

74 CoV-RBD (PDB ID: 2AJF) (42) with SWISS-MODEL (43). Iterative model building and  
75 refinement were carried out in COOT (44) and PHENIX (45), respectively. Epitope and  
76 paratope residues, as well as their interactions, were identified by accessing PISA at the  
77 European Bioinformatics Institute ([http://www.ebi.ac.uk/pdbe/prot\\_int/pistart.html](http://www.ebi.ac.uk/pdbe/prot_int/pistart.html)) (35).

78

### 79 **Biolayer interferometry binding assay**

80 Binding assays were performed by biolayer interferometry (BLI) using an Octet Red  
81 instrument (FortéBio) as described previously (46). Briefly, His<sub>6</sub>-tagged S and RBD  
82 proteins at 20 to 100 µg/mL in 1x kinetics buffer (1x PBS, pH 7.4, 0.01% BSA and  
83 0.002% Tween 20) were loaded onto Anti-Penta-HIS (HIS1K) biosensors and incubated  
84 with the indicated concentrations of CR3022 Fab or IgG. The assay consisted of five  
85 steps: 1) baseline: 60 s with 1x kinetics buffer; 2) loading: 300 s with his<sub>6</sub>-tagged S or  
86 RBD proteins; 3) baseline: 60 s with 1x kinetics buffer; 4) association: 120 s with  
87 samples (Fab or IgG); and 5) dissociation: 120 s with 1x kinetics buffer. For estimating  
88 the exact K<sub>d</sub>, a 1:1 binding model was used.

89

### 90 **Microneutralization assay**

91 Monoclonal antibodies were mixed with equal volumes of SARS-CoV or SARS-CoV-2 at  
92 a dose of 100 tissue culture infective doses 50% (TCID<sub>50</sub>) determined by Vero and Vero  
93 E6 cells respectively. After 1 h of incubation at 37°C, 35 µl of the virus-antibody mixture  
94 was added in quadruplicate to Vero or Vero E6 cell monolayers in 96-well microtiter  
95 plates. After 1 h of adsorption, the virus-antibody mixture was removed and replaced  
96 with 150 µl of virus growth medium in each well. The plates were incubated for 3 days at  
97 37°C in 5% CO<sub>2</sub> in a humidified incubator. A cytopathic effect was observed at day 3  
98 post-inoculation. The highest plasma dilution that protected 50% of the replicate wells

99 was denoted as the neutralizing antibody titer. A virus back-titration of the input virus  
100 was included in each batch of tests.  
101

**A**

CDR H1

CR3022: MQLVQSGT**E**VKKPGESLKISCKGSGY**G**F**I**TYWIGWVRQMP  
 IGHV5-51: VQLVQSGAEVKKPGESLKISCKGSGYSFTSYWIGWVRQMP  
31 32 33 34 35

CDR H2

CR3022: GKGLEWMGIIYPGDS**E**TRYSPSFQGGQVTISADKSIN**T**AYL  
 IGHV5-51: GKGLEWMGIIYPGDS**D**TRYSPSFQGGQVTISADKSIS**T**AYL  
50 51 52 53 54 55 56 57 58 59 60 61 62 63 64 65  
52a

CDR3 H3

CR3022: QWSSLKASDTA**I**YYCAGGSGISTPMDVWGQGT**T**TVT  
 IGHV5-51: QWSSLKASDTAM**Y**YCA-----  
95 96 97 98 99 100 100a 101 102

**B**

CDR L1

CR3022: DI**Q**LTQSPDSLAVSLGERATINCKSSQSVLYSS**I**NKNYLA  
 IGKV4-1: DIVMTQSPDSLAVSLGERATINCKSSQSVLYSS**N**NKNYLA  
24 25 26 27 27a 27b 27c 27d 27e 27f 28 29 30 31 32 33 34

CDR L2

CR3022: WYQ**Q**KPGQPPKLLIYWASTRESGVPDRFSGSGSGTDF**T**LT  
 IGKV4-1: WYQ**Q**KPGQPPKLLIYWASTRESGVPDRFSGSGSGTDF**T**LT  
50 51 52 53 54 55

CDR L3

CR3022: ISSLQAEDVAVYYC**Q**YYSTPYTFGQGT**K**VEIK  
 IGKV4-1: ISSLQAEDVAVYYC**Q**YYSTP-----  
88 89 90 91 92 93 94 95

**C**

C A G G S G I S T P M D V W  
 TGTGCG**GGGGTTCGGGATTCTACCC**TATGGACGTCTGG  
IGHD3-10 IGHJ6

Total gene-derived nucleotides: 23  
 Total non-gene-derived nucleotides: 13

102

103 **Fig. S1. Comparison of CR3022 sequence to its putative germline sequence.**

104 Alignment of CR3022 **(A)** with the germline IGHV5-51 sequence, and **(B)** with the

105 germline IGKV4-1 sequence. The regions that correspond to CDR H1, H2, H3, L1, L2,

106 and L3 are indicated. Residues that differ from the germline are highlighted in red.

107 Residue positions in the CDRs are labeled according to the Kabat numbering scheme.

108 **(C)** Sequence of the V-D-J junction of CR3022, with putative gene segments (blue) and

109 N-regions (red) are indicated.

110

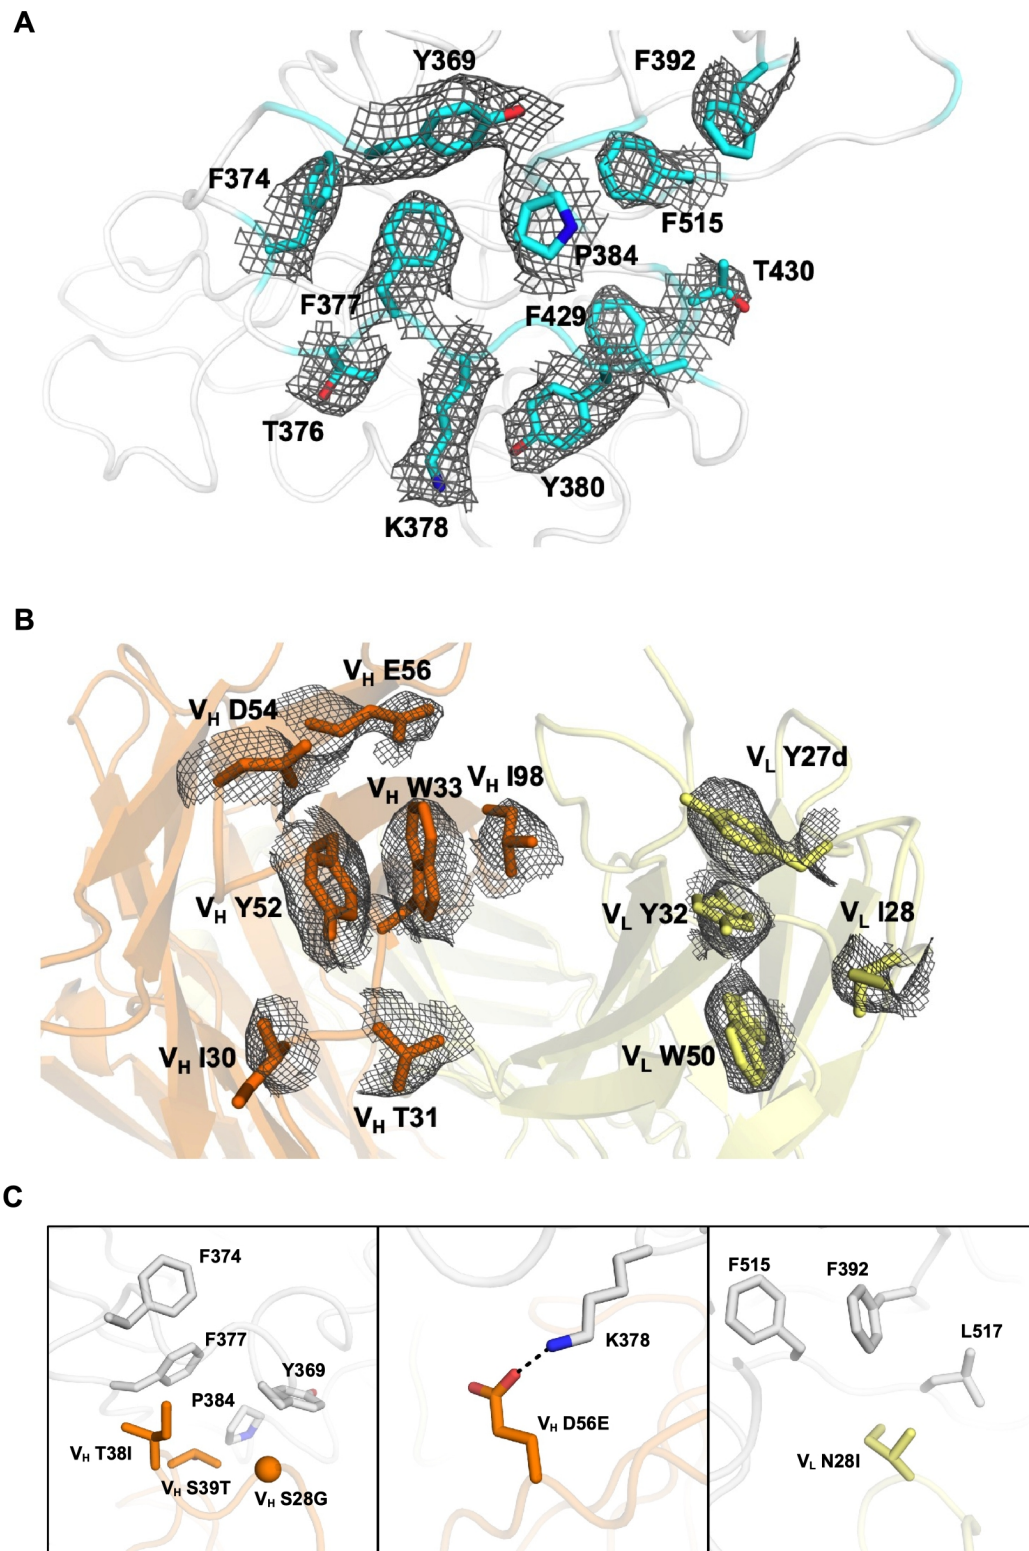

111

112 **Fig. S2. Electron density maps for epitope and paratope regions and structural**

113 **analysis of somatic mutations. (A)** Final 2Fo-Fc electron density maps for the side  
114 chains in the epitope region (cyan) of SARS-CoV-2 contoured at 1  $\sigma$ . **(B)** Final 2Fo-Fc  
115 electron density maps for the paratope region of CR3022 contoured at 1  $\sigma$ . The heavy  
116 chain is colored in orange, and light chain in yellow. Residues are labeled. **(C)** Somatic  
117 mutations V<sub>H</sub> S28G, V<sub>H</sub> T38I, V<sub>H</sub> S39T, V<sub>H</sub> D56E, and V<sub>L</sub> N28I are located in the CR3022  
118 paratope region. Hydrogen bonds are represented by dashed lines. CR3022 heavy  
119 chain is in orange and light chain is in yellow. SARS-CoV-2 RBD is in light grey.



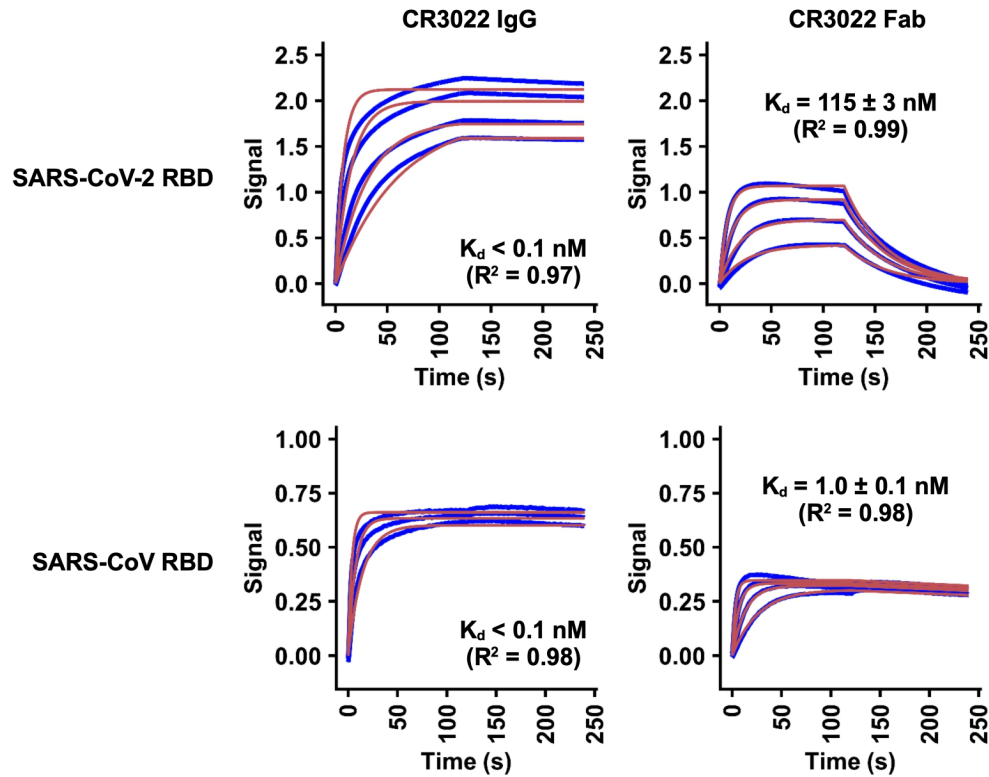

120

121 **Fig. S3. Sensorgrams for binding of CR3022 IgG and Fab to RBDs of SARS-CoV-2**

122 **and SARS-CoV.** Binding kinetics of CR3022 Fab and IgG against the RBDs of SARS-

123 CoV-2 and SARS-CoV were measured by biolayer interferometry (BLI). Y-axis

124 represents the response. Blue lines represent the response curves and red lines

125 represent the 1:1 binding model. Binding kinetics were measured for three to four

126 concentrations of IgG or Fab at 2-fold dilution ranging from 500 nM to 62.5 nM. The  $K_d$

127 and  $R^2$  of the fitting are indicated. The enhanced binding of IgG as compared to Fab is

128 likely due to bivalent binding. Of note, stoichiometry cannot be inferred from this

129 experiment.

**A**

|                |     |      |      |      |      |      |    |    |     |    |    |    |    |    |    |    |    |    |     |    |    |     |   |     |
|----------------|-----|------|------|------|------|------|----|----|-----|----|----|----|----|----|----|----|----|----|-----|----|----|-----|---|-----|
| SARS-CoV RBD   | 306 | RVVP | SGD  | VVRF | PNIT | NLCP | FG | EV | FN  | AT | KF | PS | VY | AW | ER | KK | IS | NC | VAD | YS | VL | 355 |   |     |
| SARS-CoV-2 RBD | 319 | RVQP | TESI | VRFP | PNIT | NLCP | FG | EV | FN  | AT | RF | AS | VY | AW | NR | KR | IS | NC | VAD | YS | VL | 368 |   |     |
|                |     |      |      |      |      |      |    |    |     |    |    |    |    |    |    |    |    |    |     |    |    |     |   |     |
| SARS-CoV RBD   | 356 | YN   | ST   | FF   | ST   | FK   | CY | GV | SAT | K  | L  | N  | D  | L  | C  | F  | S  | N  | V   | Y  | A  | D   | S | 405 |
| SARS-CoV-2 RBD | 369 | YNSA | S    | FF   | ST   | FK   | CY | GV | SPT | K  | L  | N  | D  | L  | C  | F  | T  | N  | V   | Y  | A  | D   | S | 418 |
|                |     |      |      |      |      |      |    |    |     |    |    |    |    |    |    |    |    |    |     |    |    |     |   |     |
| SARS-CoV RBD   | 406 | AD   | NY   | K    | L    | P    | D  | D  | F   | M  | G  | C  | V  | L  | A  | W  | N  | T  | R   | N  | I  | D   | A | 455 |
| SARS-CoV-2 RBD | 419 | AD   | NY   | K    | L    | P    | D  | D  | F   | T  | G  | C  | V  | I  | A  | W  | S  | N  | N   | L  | D  | S   | K | 468 |
|                |     |      |      |      |      |      |    |    |     |    |    |    |    |    |    |    |    |    |     |    |    |     |   |     |
| SARS-CoV RBD   | 456 | SN   | P    | F    | S    | P    | D  | G  | K   | P  | C  | T  | P  | -  | P  | A  | L  | N  | C   | Y  | W  | P   | L | 504 |
| SARS-CoV-2 RBD | 469 | ST   | E    | I    | Y    | Q    | A  | G  | S   | T  | P  | C  | N  | G  | V  | E  | F  | N  | C   | Y  | F  | P   | L | 518 |
|                |     |      |      |      |      |      |    |    |     |    |    |    |    |    |    |    |    |    |     |    |    |     |   |     |
| SARS-CoV RBD   | 505 | N    | A    | P    | A    | T    | V  | C  | G   | P  | K  | L  | S  | T  | D  | L  | I  | K  | N   | Q  | C  | V   | N | 529 |
| SARS-CoV-2 RBD | 519 | H    | A    | P    | A    | T    | V  | C  | G   | P  | K  | K  | S  | T  | N  | L  | V  | K  | N   | K  | C  | V   | N | 542 |

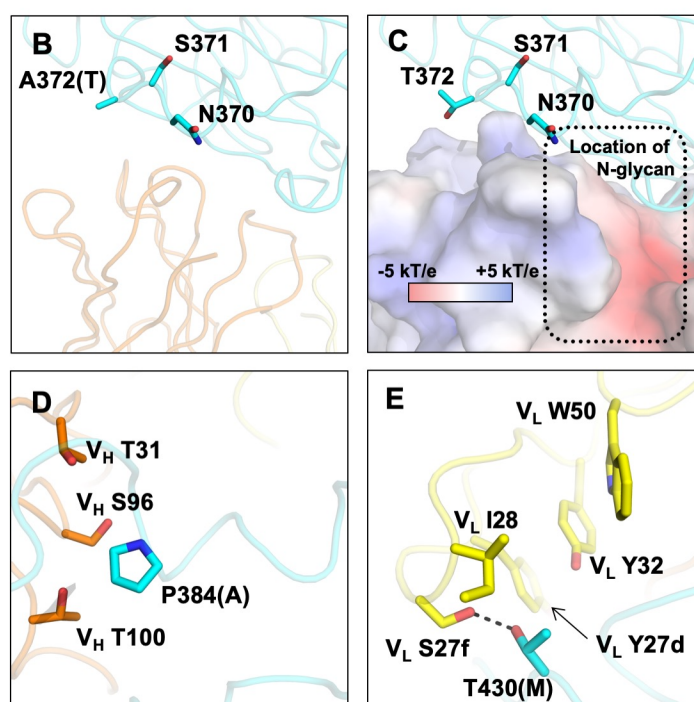

130

131 **Fig. S4. Non-conserved epitope residues.** (A) Sequence alignment of SARS-CoV-2  
 132 RBD and SARS-CoV RBD. CR3022 epitope residues are colored cyan. ACE2-binding  
 133 residues are colored magenta. Non-conserved epitope residues are marked by  
 134 asterisks. (B-E) Interactions between the non-conserved epitope residues and CR3022  
 135 are shown. Amino-acid variants observed in SARS-CoV are in parenthesis. SARS-CoV-  
 136 2 RBD is colored in cyan, CR3022 heavy chain in orange, and CR3022 light chain in  
 137 yellow. Residues are numbered according to their positions on the SARS-CoV-2 S

138 protein sequence. **(B)** While SARS-CoV-2 has an Ala at residue 372, SARS-CoV has a  
139 Thr, which introduces an N-glycosylation site at residue N370. **(C)** The potential location  
140 of N370 glycan in SARS-CoV RBD is indicated by the box. CR3022 is shown as an  
141 electrostatic potential surface presentation. **(D)** P384 interacts with T31, S96, and T100  
142 of CR3022 heavy chain. Ala at this position in SARS-CoV would allow the backbone to  
143 adopt a different conformation when binding to CR3022. **(E)** T430 forms a hydrogen  
144 bond with S27f of CR3022 light chain. Met at this position in SARS-CoV would instead  
145 likely insert its side chain into the hydrophobic pocket formed by Y27d, I28, Y32, and  
146 W50 of CR3022 light chain.

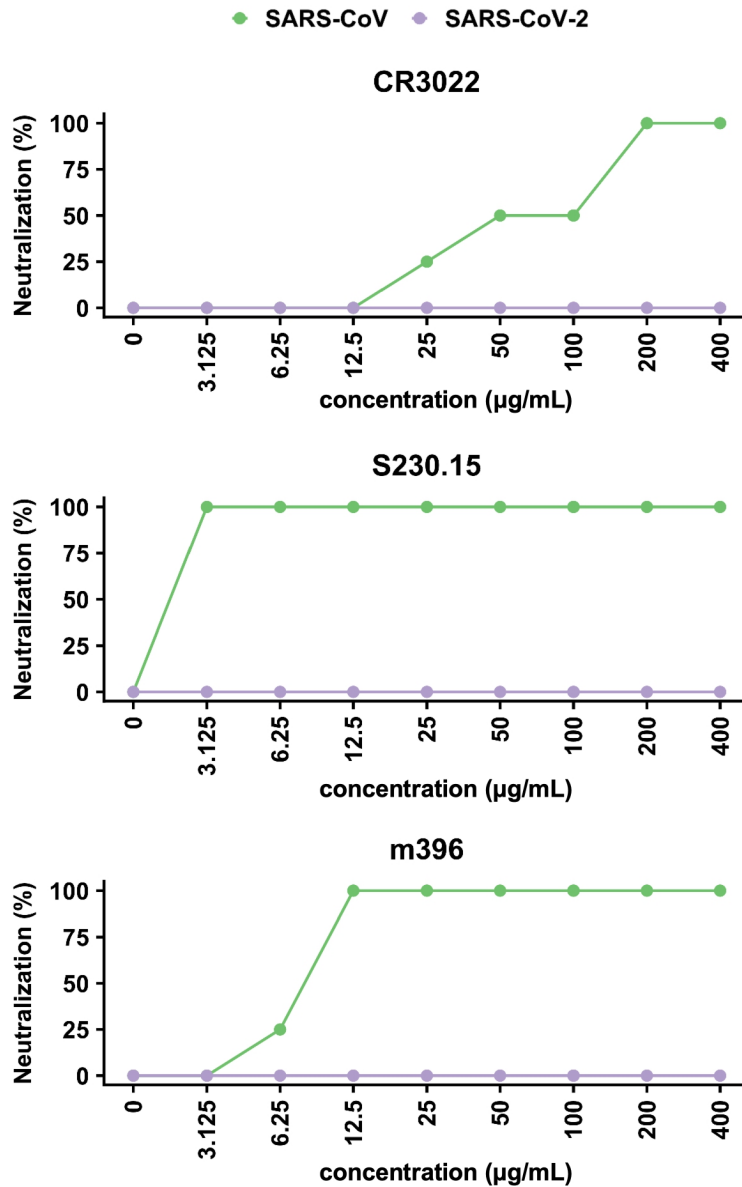

147

148 **Fig. S5. Neutralization activity of SARS-neutralizing monoclonal antibodies**  
 149 **against SARS-CoV-2 and SARS-CoV.** Microneutralization of SARS-CoV-2 and SARS-  
 150 CoV with monoclonal antibodies **(A)** CR3022, **(B)** S230.15 (39), and **(C)** m396 (16).

151 Neutralization of 100 TCID<sub>50</sub> of each virus was performed in quadruplicate.

152

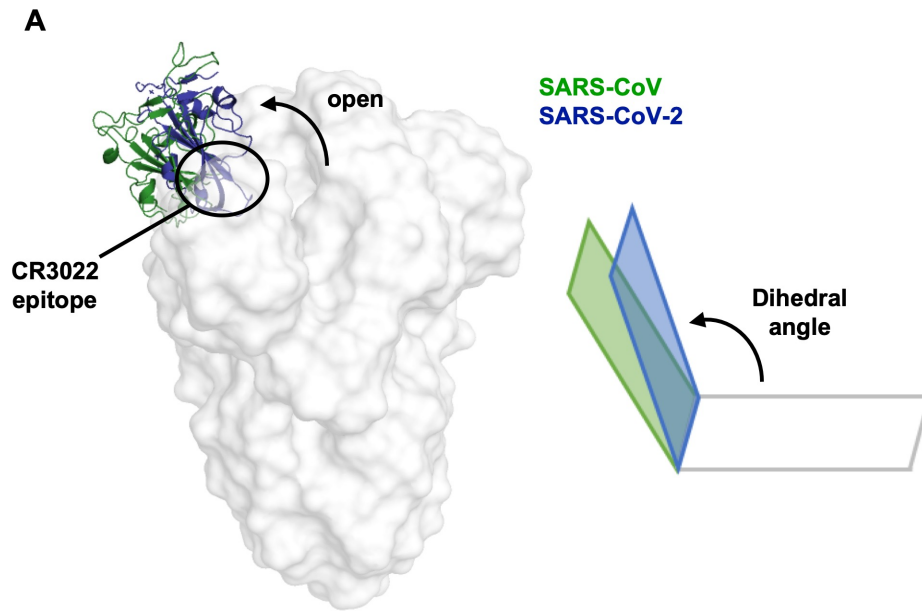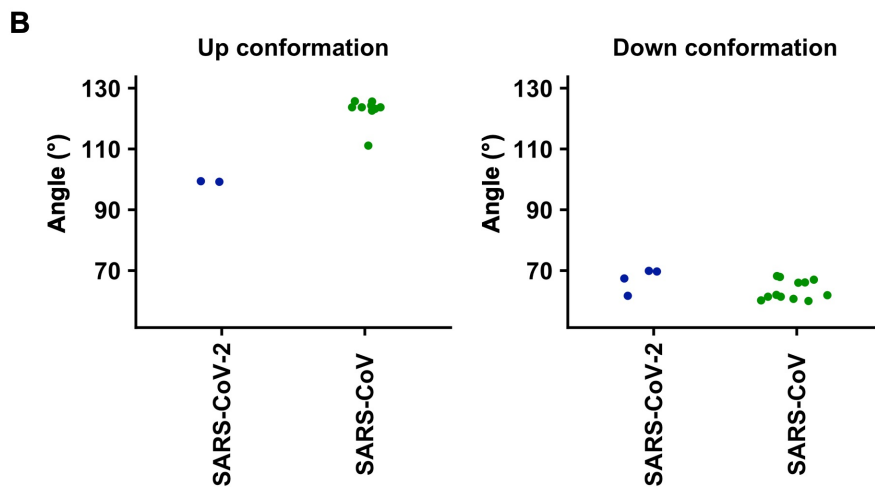

**C**

| PDB      | 2AJF<br>(copy 1) | 2AJF<br>(copy 2) | 6VSB<br>(protomer 1) | 6VSB<br>(protomer 2) | 6VSB<br>(protomer 3) | 6VYB<br>(protomer 1) | 6VYB<br>(protomer 2) | 6VYB<br>(protomer 3) |
|----------|------------------|------------------|----------------------|----------------------|----------------------|----------------------|----------------------|----------------------|
| State    | -                | -                | up                   | down                 | down                 | up                   | down                 | down                 |
| RMSD (Å) | 1.22             | 1.54             | 1.11                 | 1.94                 | 1.00                 | 1.07                 | 1.37                 | 1.11                 |

153

154 **Fig. S6. Comparison of the “up” conformations between the SARS-CoV-2 and**

155 **SARS-CoV S proteins. (A) Structural alignment of the one-“up” S proteins from SARS-**

156 **CoV-2 (PDB 6VSB (17)) and SARS-CoV (PDB 6CRW (21)). The RBD with an “up”**

157 **conformation from SARS-CoV-2 is in blue and from SARS-CoV is in green. (B) The RBD**

158 open angle is represented by a dihedral angle between the RBD and the horizontal  
159 plane. Given that the RBD of interest is on protomer 1, the dihedral angle is measured  
160 by the angle of P507 Ca (protomer 1) – R983 Ca (protomer 2) – R983 Ca (protomer 1) –  
161 R983 Ca (protomer 3) for SARS-CoV-2, which corresponds to of P493 Ca (protomer 1)  
162 – R965 Ca (protomer 2) – R965 Ca (protomer 1) – R965 Ca (protomer 3) for SARS-  
163 CoV. For this analysis, S protein structures with PDB IDs of 6VSB (17), 6VYB (18) were  
164 used for SARS-CoV-2, whereas 5X5B (19), 6CRX (21), 6VS0, 6VS1, 6CRW (21), 6ACD  
165 (47), and 6CRZ (21) were used for SARS-CoV. **(C)** Root-mean-square deviation (RMSD  
166 Ca) of the RBDs from different structures were computed using “super” function in  
167 PyMOL with no refinement cycle. PDB 2AJF (42), 6VSB (17), and 6VYB (18) were used  
168 in this analysis.

**Table S1. X-ray data collection and refinement statistics**

| <b>Data collection</b>                                               |                                    |
|----------------------------------------------------------------------|------------------------------------|
| Beamline                                                             | APS 23ID-D                         |
| Wavelength (Å)                                                       | 1.03322                            |
| Space group                                                          | P4 <sub>1</sub> 22                 |
| Unit cell parameters                                                 | a=b=147.5°, c=200.2°               |
| Resolution (Å)                                                       | 50.0-3.10 (3.21-3.10) <sup>a</sup> |
| Unique reflections                                                   | 41,206 (938) <sup>a</sup>          |
| Redundancy                                                           | 6.7 (5.5) <sup>a</sup>             |
| Completeness (%)                                                     | 100.0 (100.0) <sup>a</sup>         |
| <I/σ <sub>I</sub> >                                                  | 18.8 (1.0) <sup>a</sup>            |
| R <sub>sym</sub> <sup>b</sup> (%)                                    | 13.6 (>100) <sup>a</sup>           |
| R <sub>plim</sub> <sup>b</sup> (%)                                   | 4.0 (54.0) <sup>a</sup>            |
| CC <sub>1/2</sub> <sup>c</sup> (%)                                   | 100.0 (59.1) <sup>a</sup>          |
| <b>Refinement statistics</b>                                         |                                    |
| Resolution (Å)                                                       | 50.0-3.10                          |
| Reflections (work)                                                   | 41,137                             |
| Reflections (test)                                                   | 2,030                              |
| R <sub>cryst</sub> <sup>d</sup> / R <sub>free</sub> <sup>e</sup> (%) | 22.3/24.3                          |
| No. of atoms                                                         | 4,936                              |
| Macromolecules                                                       | 4,906                              |
| Ligands                                                              | 30                                 |
| Average B-value (Å <sup>2</sup> )                                    | 99                                 |
| Macromolecules                                                       | 99                                 |
| Ligands                                                              | 137                                |
| Wilson B-value (Å <sup>2</sup> )                                     | 95                                 |
| <b>RMSD from ideal geometry</b>                                      |                                    |
| Bond length (Å)                                                      | 0.002                              |
| Bond angle (°)                                                       | 0.52                               |
| <b>Ramachandran statistics (%)</b>                                   |                                    |
| Favored                                                              | 97.2                               |
| Outliers                                                             | 0.0                                |
| <b>PDB code</b>                                                      |                                    |
|                                                                      | 6W41                               |

<sup>a</sup> Numbers in parentheses refer to the highest resolution shell.

<sup>b</sup>  $R_{sym} = \frac{\sum_{hkl} \sum_i |I_{hkl,i} - \langle I_{hkl} \rangle|}{\sum_{hkl} \sum_i I_{hkl,i}}$  and  $R_{plim} = \frac{\sum_{hkl} (1/(n-1))^{1/2} \sum_i |I_{hkl,i} - \langle I_{hkl} \rangle|}{\sum_{hkl} \sum_i I_{hkl,i}}$ , where  $I_{hkl,i}$  is the scaled intensity of the  $i^{\text{th}}$  measurement of reflection h, k, l,  $\langle I_{hkl} \rangle$  is the average intensity for that reflection, and  $n$  is the redundancy.

<sup>c</sup> CC<sub>1/2</sub> = Pearson correlation coefficient between two random half datasets.

<sup>d</sup>  $R_{cryst} = \frac{\sum_{hkl} |F_o - F_c|}{\sum_{hkl} |F_o|} \times 100$ , where  $F_o$  and  $F_c$  are the observed and calculated structure factors, respectively.

<sup>e</sup>  $R_{free}$  was calculated as for  $R_{cryst}$ , but on a test set comprising 5% of the data excluded from refinement.

170  
171  
172  
173  
174

**Table S2. Hydrogen bonds and salt bridges identified at the SARS-CoV-2 RBD and CR3022 interface using the PISA program**

| <b>Hydrogen bonds</b> |                  |                            |
|-----------------------|------------------|----------------------------|
| <b>SARS-CoV-2 RBD</b> | <b>Dist. (Å)</b> | <b>CR3022</b>              |
| PHE377[N]             | 3.0              | V <sub>H</sub> TYR52[OH]   |
| LYS378[N]             | 3.9              | V <sub>H</sub> TYR52[OH]   |
| LYS378[NZ]            | 2.7              | V <sub>H</sub> ASP54[OD2]  |
| LYS378[NZ]            | 2.4              | V <sub>H</sub> GLU56[OE1]  |
| LYS386[NZ]            | 3.3              | V <sub>H</sub> ASP101[OD1] |
| PHE377[O]             | 2.5              | V <sub>H</sub> TYR52[OH]   |
| CYS379[O]             | 3.2              | V <sub>H</sub> ILE98[N]    |
| THR430[OG1]           | 2.4              | V <sub>L</sub> SER27f[OG]  |
| GLY381[O]             | 2.3              | V <sub>L</sub> TYR32[OH]   |
| <b>Salt bridges</b>   |                  |                            |
| LYS378[NZ]            | 2.7              | V <sub>H</sub> ASP54[OD2]  |
| LYS378[NZ]            | 2.4              | V <sub>H</sub> GLU56[OE1]  |
| LYS378[NZ]            | 3.4              | V <sub>H</sub> ASP54[OD1]  |
| LYS386[NZ]            | 3.3              | V <sub>H</sub> ASP101[OD1] |
| LYS386[NZ]            | 3.6              | V <sub>H</sub> ASP101[OD2] |



175  
176  
177

**Table S3. Epitope residues on the SARS-CoV-2 RBD and their buried surface area upon binding to CR3022**

178

179

| SARS-CoV-2 RBD | BSA (Å <sup>2</sup> ) |
|----------------|-----------------------|
| TYR369         | 50                    |
| ASN370         | 41                    |
| SER371         | 5                     |
| ALA372         | 11                    |
| PHE374         | 17                    |
| SER375         | 17                    |
| THR376         | 23                    |
| PHE377         | 63                    |
| LYS378         | 96                    |
| CYS379         | 35                    |
| TYR380         | 66                    |
| GLY381         | 11                    |
| VAL382         | 8                     |
| SER383         | 37                    |
| PRO384         | 33                    |
| THR385         | 42                    |
| LYS386         | 105                   |
| ASP389         | 6                     |
| LEU390         | 32                    |
| PHE392         | 17                    |
| ASP427         | 7                     |
| ASP428         | 58                    |
| PHE429         | 7                     |
| THR430         | 50                    |
| PHE515         | 6                     |
| GLU516         | 6                     |
| LEU517         | 49                    |
| HIS519         | 20                    |

180 **REFERENCES**

- 181 38. D. C. Ekiert *et al.*, A highly conserved neutralizing epitope on group 2 influenza A  
182 viruses. *Science* **333**, 843-850 (2011).
- 183 39. A. C. Walls *et al.*, Unexpected receptor functional mimicry elucidates activation of  
184 coronavirus fusion. *Cell* **176**, 1026-1039 e1015 (2019).
- 185 40. Z. Otwinowski, W. Minor, Processing of X-ray diffraction data collected in  
186 oscillation mode. *Methods Enzymol* **276**, 307-326 (1997).
- 187 41. A. Teplyakov *et al.*, Antibody modeling assessment II. Structures and models.  
188 *Proteins* **82**, 1563-1582 (2014).
- 189 42. F. Li, W. Li, M. Farzan, S. C. Harrison, Structure of SARS coronavirus spike  
190 receptor-binding domain complexed with receptor. *Science* **309**, 1864-1868  
191 (2005).
- 192 43. K. Arnold, L. Bordoli, J. Kopp, T. Schwede, The SWISS-MODEL workspace: a  
193 web-based environment for protein structure homology modelling. *Bioinformatics*  
194 **22**, 195-201 (2006).
- 195 44. P. Emsley, K. Cowtan, Coot: model-building tools for molecular graphics. *Acta*  
196 *Crystallogr D Biol Crystallogr* **60**, 2126-2132 (2004).
- 197 45. P. D. Adams *et al.*, PHENIX: a comprehensive Python-based system for  
198 macromolecular structure solution. *Acta Crystallogr D Biol Crystallogr* **66**, 213-  
199 221 (2010).
- 200 46. N. C. Wu *et al.*, In vitro evolution of an influenza broadly neutralizing antibody is  
201 modulated by hemagglutinin receptor specificity. *Nat Commun* **8**, 15371 (2017).
- 202 47. W. Song, M. Gui, X. Wang, Y. Xiang, Cryo-EM structure of the SARS coronavirus  
203 spike glycoprotein in complex with its host cell receptor ACE2. *PLoS Pathog* **14**,  
204 e1007236 (2018).  
205
